# Supplementary material
Source: PubMed Central journal article supplement (PMC4035450)
Supplement: NIHMS576160-supplement-01.pdf [file NIHMS576160-supplement-01.pdf]

## 1299 **Supplementary Materials and** 1300 **Methods**

### 1302 *Immunohistochemistry*

1303 For all except staining performed on frozen samples,  
1304 samples were prepared with 10% neutral buffered formalin  
1305 (VWR International, Radnor, PA), embedded in paraffin, and  
1306 sectioned by the Johns Hopkins Medical Institutions Refer-  
1307 ence Histology Laboratory. All antibodies are shown in  
1308 [Supplementary Table 1](#). For CD4 and CD8 stains, pancreata  
1309 were frozen in Tissue-Tek OCT (Sakura Finetek USA, Inc,  
1310 Torrance, CA) with liquid nitrogen and cut in 5- $\mu$ m sections  
1311 using a cryostat, followed by -20°C acetone fixation. Sections  
1312 were incubated with primary antibodies to CD4, CD8, or  
1313 isotype control (R35-95) (BD Pharmingen, San Jose, CA) for  
1314 1 hour and with biotin-conjugated secondary antibody  
1315 (G28-5; BD Pharmingen) for 30 minutes. Antigen retrieval  
1316 was performed by steam heating in Citra antigen retrieval  
1317 solution (BioGenex, Fremont, CA) for Ly6G and with pro-  
1318 teinase K (Dako North America, Inc, Carpinteria, CA) for F4/  
1319 80 antibody staining. The corresponding biotinylated sec-  
1320 ondary antibodies were supplied by Vector Laboratories, Inc  
1321 (Burlingame, CA). For Foxp3, slides were stained by the  
1322 Johns Hopkins IHC laboratory using the Envision FLEX,  
1323 high-pH system (Dako) for automated Dako platforms. For  
1324 patient samples, sections were stained with anti-CD3 using  
1325 ultraView Detection (Ventana Medical Systems, Inc, Tucson,  
1326 AZ) according to standard Ventana protocols in the Johns  
1327 Hopkins University Immunopathology Laboratory. For  
1328 ROR $\gamma$ t, antigen retrieval was performed with EDTA at 95°C  
1329 for 20 minutes and slides were stained using Leica auto  
1330 stainers and Bond Polymer Refine Detection (Leica Micro-  
1331 systems, Inc, Buffalo Grove, IL).

### 1333 *Flow Cytometry*

1334 The antibodies used in flow cytometry staining are  
1335 shown in [Supplementary Table 2](#). The Live/Dead Fixable  
1336 Dead Cell Stain Kit (Life Technologies) and FcBlock (anti-  
1337 CD16/CD32) (BD Biosciences) were used routinely before  
1338

1358 staining with antibodies to cell surface markers and intra-  
1359 cellular cytokines.

### 1360 *CD8- and IL17-Depletion Assays*

1361 The CD8-depleting antibody 2.43 (500  $\mu$ g intraperitoneal  
1362 injection)<sup>1</sup> or control rat IgG was given every other day for 1  
1363 week before vaccination, followed by twice-weekly in-  
1364 jections throughout the 5-week course of vaccination and  
1365 Treg depletion. CD8 depletion was verified routinely  
1366 throughout the study by flow cytometry. Anti-IL17 antibody,  
1367 a gift from Dr Jerry Niederkorn,<sup>2</sup> or control IgG was given in  
1368 a 200- $\mu$ g dose twice weekly for the first week, followed by  
1369 100  $\mu$ g twice-weekly injections for the duration of a 5-week  
1370 cycle of LM-Kras and Treg depletion.

### 1372 *Histologic Analysis of Pancreatic Lesions*

1373 For the CD8-depletion and IL17-depletion studies, the  
1374 Cavalieri estimator method was used to estimate PanIN or <sup>q43</sup>  
1375 PDA volumes present in the pancreata.<sup>3</sup> Two sections per  
1376 pancreas were scanned at a magnification of 20 $\times$  (0.498  
1377  $\mu$ m/pixel) using a ScanScope CS (Aperio, Inc, San Diego, CA).  
1378 Briefly, a point counting grid with a grid spacing of 75  $\mu$ m  
1379 was applied to each whole slide image in custom Java  
1380 software (freely available at <https://bitbucket.org/tcornish/point-counting>). The percentage of tissue occupied by each  
1381 histologic category was calculated based on intersection  
1382 points counted for each feature.

## 1383 **References**

- 1384 1. Reilly RT, Gottlieb MB, Ercolini AM, et al. HER-2/neu is a  
1385 tumor rejection target in tolerized HER-2/neu transgenic  
1386 mice. *Cancer Res* 2000;60:3569–3576.
- 1387 2. De Paiva CS, Chotikavanich S, Pangelinan SB, et al.  
1388 IL-17 disrupts corneal barrier following desiccating  
1389 stress. *Mucosal Immunol* 2009;2:243–253.
- 1390 3. Mouton PR. Principles and practices of unbiased stere-  
1391 ology. Baltimore: Johns Hopkins University Press, 2002.

1392  
1393  
1394  
1395  
1396  
1397  
1398  
1399  
1400  
1401  
1402  
1403  
1404  
1405  
1406  
1407  
1408  
1409  
1410  
1411  
1412  
1413  
1414  
1415  
1416

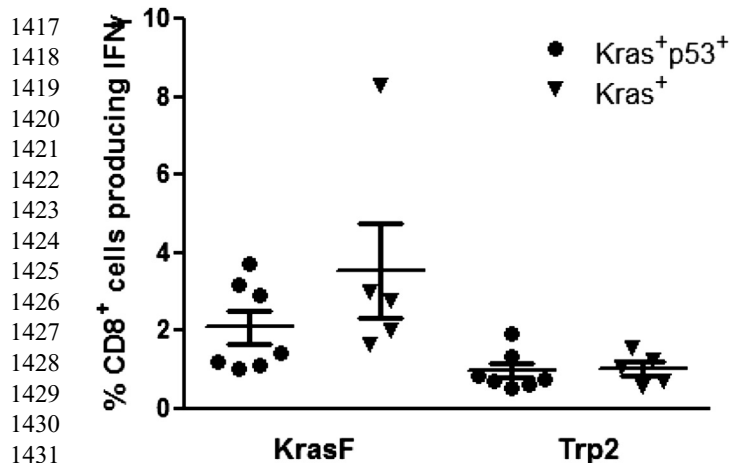

**Supplementary Figure 1.** CD8<sup>+</sup> T-cell IFN $\gamma$  production in mice comparing the p53 mutation status. Four- to 6-week-old KC (n = 5) and KPC (n = 7) mice were treated with LM-Kras twice, 4 weeks apart, killed 1 week post-vaccine, and splenocytes were harvested. Intracellular cytokine staining was used to assess response to KrasF and Trp2 (negative control) peptides between mice expressing and not expressing the p53 mutant allele. No significant difference in IFN $\gamma$  production was found in the response to KrasF.

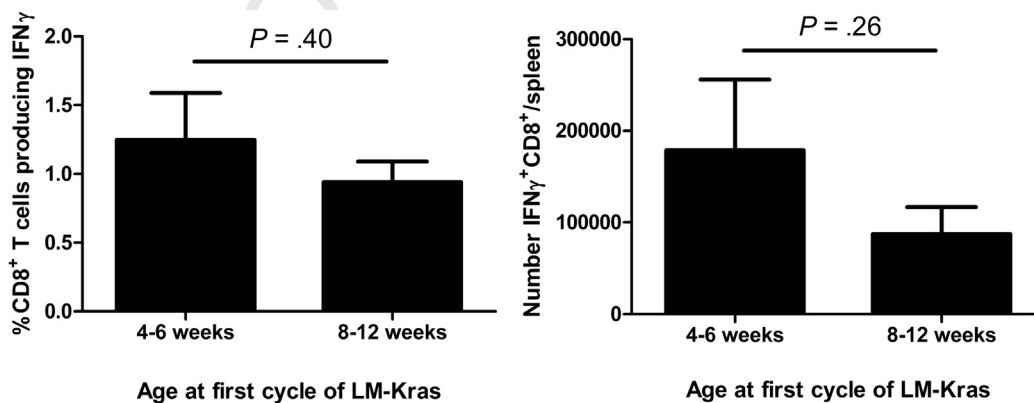

**Supplementary Figure 2.** Systemic CD8<sup>+</sup> T-cell responses in KPC mice with early and late-stage PanINs. Young (4–6 wk, correlating with early stage PanINs) and older (8–12 wk, late-stage PanINs predominate) KPC mice were vaccinated with LM-Kras and splenocytes were harvested 1 week later, stimulated with KrasF and Trp2 peptides, and intracellular cytokine assay and flow cytometry was used to assess response. The CD8<sup>+</sup> T-cell response to KrasF was normalized for control peptide (Trp2) response. Total numbers of CD8<sup>+</sup> T cells responding to KrasF were calculated based on the percentage of responders and the total number of CD8<sup>+</sup> T cells per spleen (n = 5–6 mice per group).

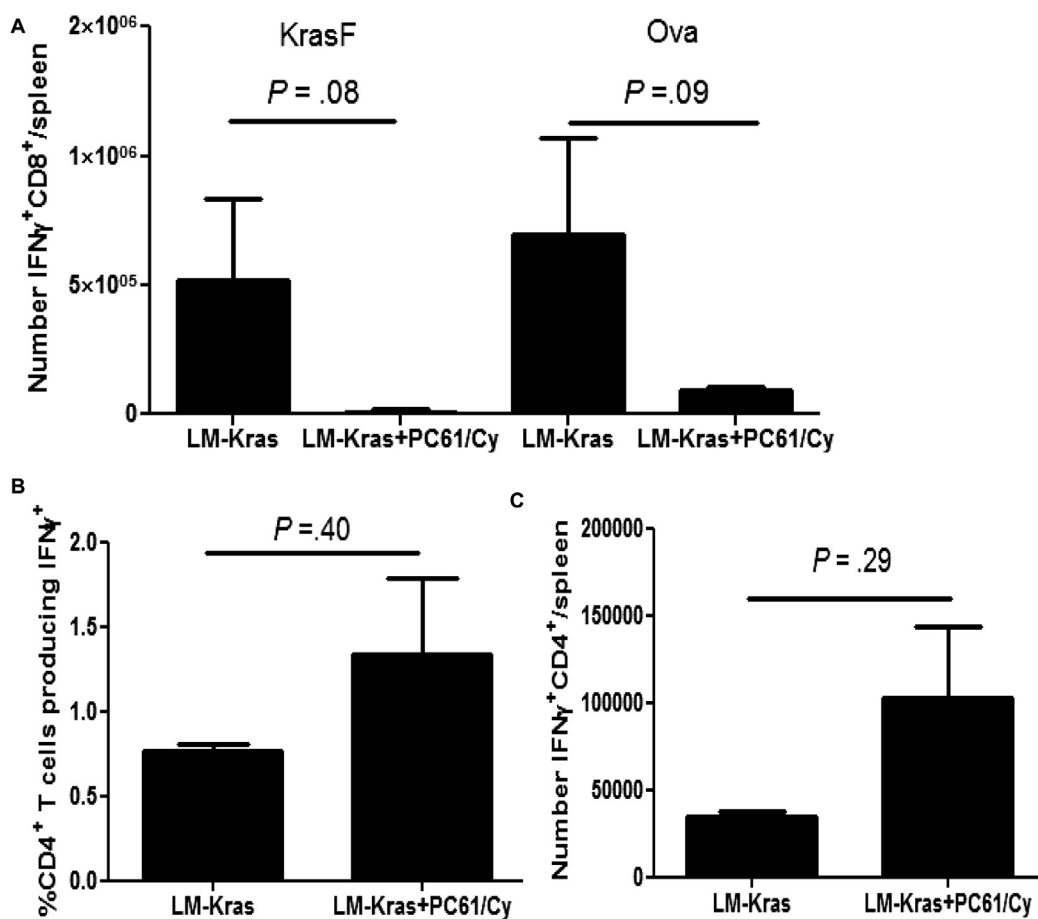

**Supplementary Figure 3.** CD8<sup>+</sup> and CD4<sup>+</sup> T-cell responses with LM-Kras and Treg depletion. (A) Splenocytes from 4- to 6-week-old treated KPC mice were harvested 1 week after vaccine; stimulated with KrasF, Ova, or Trp2 peptides; and assayed for IFN $\gamma$  production. Responses to Trp2 were subtracted from each KrasF and Ova response and the total number of CD8<sup>+</sup> T-cell responders was calculated using the total numbers of CD8<sup>+</sup> T cells per spleen (n = 6–9 per group). (B) KPC mice were treated as in panel A and splenocytes were stimulated with anti-CD3/CD28 beads overnight, followed by a 5-hour incubation with Golgi-Stop, and assayed for IFN $\gamma$  production. IFN $\gamma$  was gated on nonstimulated controls (n = 2–3 per group). Representative of 2 independent experiments.

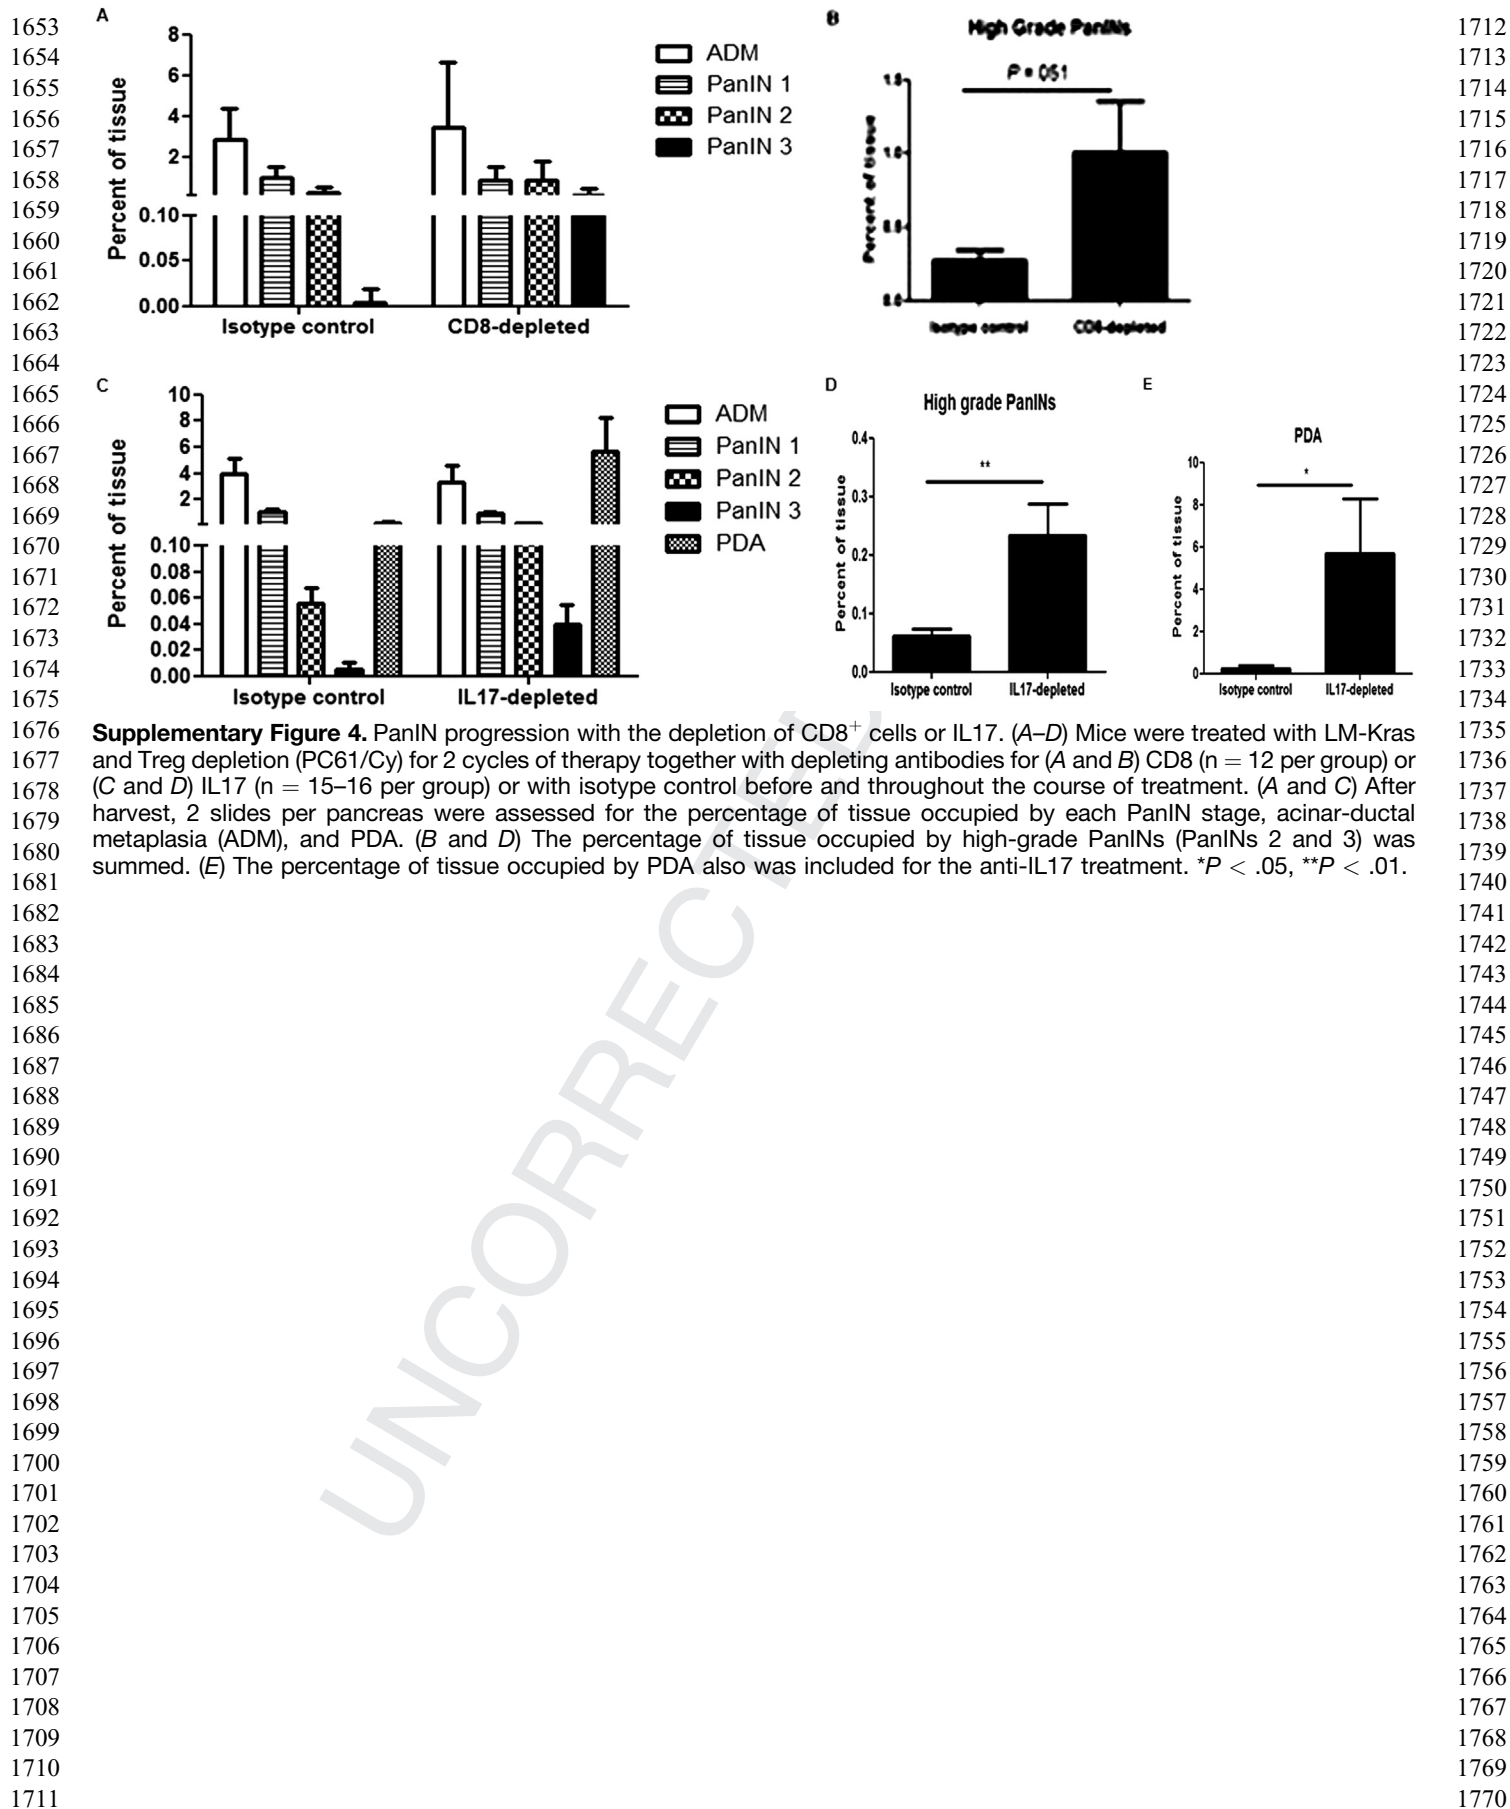

1771  
1772  
1773  
1774  
1775  
1776  
1777  
1778  
1779  
1780  
1781  
1782  
1783  
1784  
1785  
1786  
1787  
1788  
1789  
1790  
1791  
1792  
1793  
1794  
1795  
1796  
1797  
1798  
1799  
1800  
1801  
1802  
1803  
1804  
1805  
1806  
1807  
1808  
1809  
1810  
1811  
1812  
1813  
1814  
1815  
1816  
1817  
1818  
1819  
1820  
1821  
1822  
1823  
1824  
1825  
1826  
1827  
1828  
1829

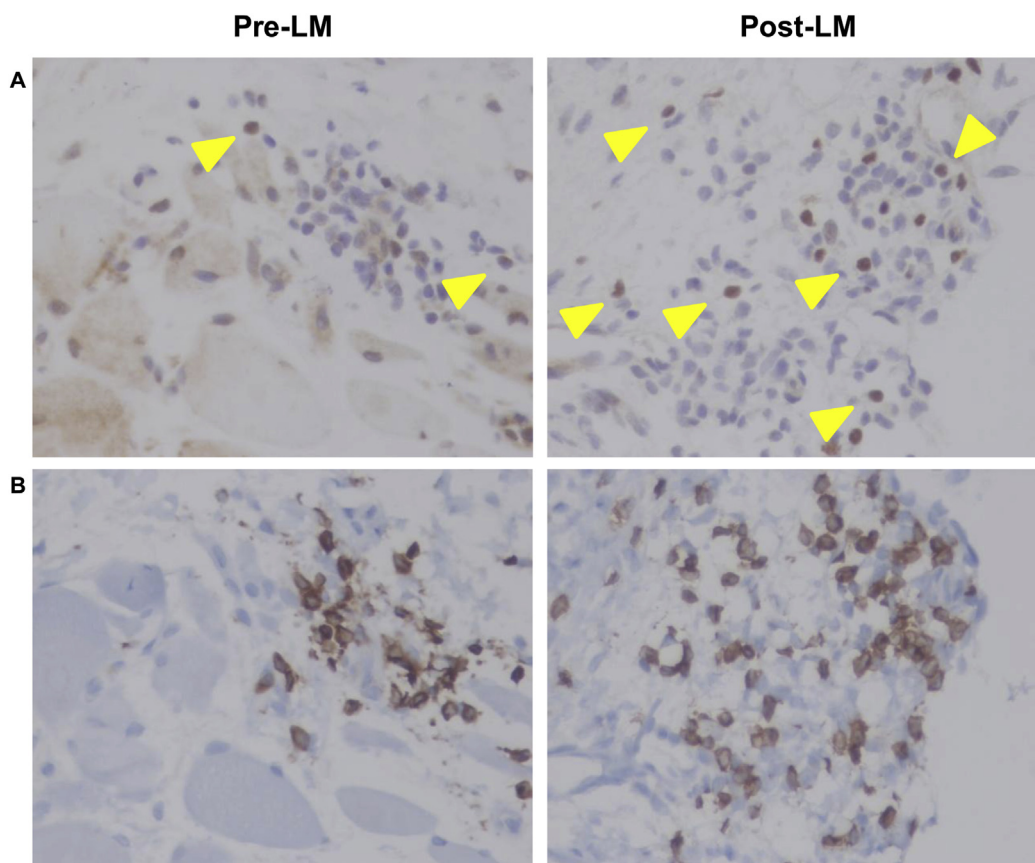

**Supplementary Figure 5.** Immune infiltrates in prevaccination and postvaccination mesothelioma biopsy specimens with a *Listeria* vaccine targeting mesothelin. Serial sections from biopsy specimens of malignant pleural mesothelioma in a patient receiving a *Listeria* vaccine targeting mesothelin (CRS-207) before administration (*left panels*) and 2 weeks after the second dose (2 doses were given 2 weeks apart) of CRS-207 (*right panels*) were stained with antibodies to (A) ROR $\gamma$ t or (B) CD3. *Arrowheads* designate cells or areas with cells containing intranuclear staining for ROR $\gamma$ t. Magnification, 40 $\times$ .

1830  
1831  
1832  
1833  
1834  
1835  
1836  
1837  
1838  
1839  
1840  
1841  
1842  
1843  
1844  
1845  
1846  
1847  
1848  
1849  
1850  
1851  
1852  
1853  
1854  
1855  
1856  
1857  
1858  
1859  
1860  
1861  
1862  
1863  
1864  
1865  
1866  
1867  
1868  
1869  
1870  
1871  
1872  
1873  
1874  
1875  
1876  
1877  
1878  
1879  
1880  
1881  
1882  
1883  
1884  
1885  
1886  
1887  
1888

1889 **Supplementary Table 1.** Antibodies Used for Immunohistochemical Staining

| Antibody       | Clone   | Vendor                                    | Concentration/dilution |
|----------------|---------|-------------------------------------------|------------------------|
| CD4            | H129.19 | BD Pharmingen                             | 5 $\mu$ g/mL           |
| CD8            | 53-6.7  | BD Pharmingen                             | 5 $\mu$ g/mL           |
| F4/80          | C1:A3-1 | AbD Serotec (Raleigh, NC)                 | 1:100                  |
| Ly6G           | 1A8     | BD Biosciences                            | 1:2000                 |
| Foxp3          | N/A     | Abbiotec, LLC (San Diego, CA)             | 1:100                  |
| CD3            | 2GV6    | Ventana Medical Systems, Inc              | Per Ventana protocol   |
| ROR $\gamma$ t | 6F3.1   | EMD Millipore Corporation (Billerica, MA) | 1:200                  |

|      |  |  |  |      |
|------|--|--|--|------|
| 1890 |  |  |  | 1948 |
| 1891 |  |  |  | 1949 |
| 1892 |  |  |  | 1950 |
| 1893 |  |  |  | 1951 |
| 1894 |  |  |  | 1952 |
| 1895 |  |  |  | 1953 |
| 1896 |  |  |  | 1954 |
| 1897 |  |  |  | 1955 |
| 1898 |  |  |  | 1956 |
| 1899 |  |  |  | 1957 |
| 1900 |  |  |  | 1958 |
| 1901 |  |  |  | 1959 |
| 1902 |  |  |  | 1960 |
| 1903 |  |  |  | 1961 |
| 1904 |  |  |  | 1962 |
| 1905 |  |  |  | 1963 |
| 1906 |  |  |  | 1964 |
| 1907 |  |  |  | 1965 |
| 1908 |  |  |  | 1966 |
| 1909 |  |  |  | 1967 |
| 1910 |  |  |  | 1968 |
| 1911 |  |  |  | 1969 |
| 1912 |  |  |  | 1970 |
| 1913 |  |  |  | 1971 |
| 1914 |  |  |  | 1972 |
| 1915 |  |  |  | 1973 |
| 1916 |  |  |  | 1974 |
| 1917 |  |  |  | 1975 |
| 1918 |  |  |  | 1976 |
| 1919 |  |  |  | 1977 |
| 1920 |  |  |  | 1978 |
| 1921 |  |  |  | 1979 |
| 1922 |  |  |  | 1980 |
| 1923 |  |  |  | 1981 |
| 1924 |  |  |  | 1982 |

1923 **Supplementary Table 2.** Flow Cytometry Antibodies

| Antibody           | Fluorochrome        | Clone     | Vendor                           |
|--------------------|---------------------|-----------|----------------------------------|
| CD3                | Allophycocyanin     | 145-2C11  | BD Pharmingen                    |
| CD8                | PerCP, Pacific Blue | 53-6.7    | BD Pharmingen                    |
| IFN $\gamma$       | PE, AF700           | XMG1.2    | BD Pharmingen                    |
| Foxp3              | PE                  | FJK-16s   | eBioscience, Inc (San Diego, CA) |
| CD3 <sup>Q46</sup> | APC-cyanine 7 (Cy7) | 145-2C11  | BioLegend (San Diego, CA)        |
| CD4                | PerCP               | GK1.5     | BioLegend                        |
| CD62L              | AF647               | MEL-14    | BioLegend                        |
| CD44               | AF700               | IM7       | BD Pharmingen                    |
| TNF $\alpha$       | AF488               | MP6-XT22  | BD Pharmingen                    |
| ROR $\gamma$ t     | PE                  | Q31-378   | BD Pharmingen                    |
| CD45               | APC-Cy7             | 30-F11    | BD Pharmingen                    |
| Gr-1               | AF700               | RB6-8C5   | BD Pharmingen                    |
| IL12               | APC                 | C15.6     | BD Pharmingen                    |
| IL17               | AF647               | eBio17B7  | eBioscience, Inc                 |
| Tbet               | PE-Cy7              | 4B10      | eBioscience, Inc                 |
| F4/80              | PE-Cy7              | BM8       | eBioscience, Inc                 |
| Ly6C               | PerCP-Cy5.5         | HK1.4     | eBioscience, Inc                 |
| IL10               | V450                | JES5-16E3 | BD Horizon (San Jose, CA)        |
| Ly6G               | V450                | 1A8       | BD Horizon                       |
| CD11b              | PE-Texas Red        | M1/70.15  | Life Technologies                |

|      |  |  |  |      |
|------|--|--|--|------|
| 1944 |  |  |  | 2003 |
| 1945 |  |  |  | 2004 |
| 1946 |  |  |  | 2005 |
| 1947 |  |  |  | 2006 |

AF, Alexa Fluor; APC, allophycocyanin; PE, phycoerythrin; PerCP, peridinin-chlorophyll protein complex; TNF, tumor necrosis factor.
